# Supplementary material
Source: publisher site journal article supplement (https://www.spandidos-publications.com/7697/downloadSupplementary)
Supplement: Supplementary file 1 [file downloadSupplementary]

## Sheet: Sheet1
Table SI. Gene sets used for immune infiltration analysis in ssGSEA.
Cell type	Marker
Activated B cell	ADAM28
Activated B cell	CD180
Activated B cell	CD79B
Activated B cell	BLK
Activated B cell	CD19
Activated B cell	MS4A1
Activated B cell	TNFRSF17
Activated B cell	IGHM
Activated B cell	GNG7
Activated B cell	MICAL3
Activated B cell	SPIB
Activated B cell	HLA-DOB
Activated B cell	IGKC
Activated B cell	PNOC
Activated B cell	FCRL2
Activated B cell	BACH2
Activated B cell	CR2
Activated B cell	TCL1A
Activated B cell	AKNA
Activated B cell	ARHGAP25
Activated B cell	CCL21
Activated B cell	CD27
Activated B cell	CD38
Activated B cell	CLEC17A
Activated B cell	CLEC9A
Activated B cell	CLECL1
Activated CD4 T cell	AIM2
Activated CD4 T cell	BIRC3
Activated CD4 T cell	BRIP1
Activated CD4 T cell	CCL20
Activated CD4 T cell	CCL4
Activated CD4 T cell	CCL5
Activated CD4 T cell	CCNB1
Activated CD4 T cell	CCR7
Activated CD4 T cell	DUSP2
Activated CD4 T cell	ESCO2
Activated CD4 T cell	ETS1
Activated CD4 T cell	EXO1
Activated CD4 T cell	EXOC6
Activated CD4 T cell	IARS
Activated CD4 T cell	ITK
Activated CD4 T cell	KIF11
Activated CD4 T cell	KNTC1
Activated CD4 T cell	NUF2
Activated CD4 T cell	PRC1
Activated CD4 T cell	PSAT1
Activated CD4 T cell	RGS1
Activated CD4 T cell	RTKN2
Activated CD4 T cell	SAMSN1
Activated CD4 T cell	SELL
Activated CD4 T cell	TRAT1
Activated CD8 T cell	ADRM1
Activated CD8 T cell	AHSA1
Activated CD8 T cell	C1GALT1C1
Activated CD8 T cell	CCT6B
Activated CD8 T cell	CD37
Activated CD8 T cell	CD3D
Activated CD8 T cell	CD3E
Activated CD8 T cell	CD3G
Activated CD8 T cell	CD69
Activated CD8 T cell	CD8A
Activated CD8 T cell	CETN3
Activated CD8 T cell	CSE1L
Activated CD8 T cell	GEMIN6
Activated CD8 T cell	GNLY
Activated CD8 T cell	GPT2
Activated CD8 T cell	GZMA
Activated CD8 T cell	GZMH
Activated CD8 T cell	GZMK
Activated CD8 T cell	IL2RB
Activated CD8 T cell	LCK
Activated CD8 T cell	MPZL1
Activated CD8 T cell	NKG7
Activated CD8 T cell	PIK3IP1
Activated CD8 T cell	PTRH2
Activated CD8 T cell	TIMM13
Activated CD8 T cell	ZAP70
Activated dendritic cell	ABCD1
Activated dendritic cell	C1QC
Activated dendritic cell	CAPG
Activated dendritic cell	CCL3L3
Activated dendritic cell	CD207
Activated dendritic cell	CD302
Activated dendritic cell	ATP5B
Activated dendritic cell	ATP5L
Activated dendritic cell	ATP6V1A
Activated dendritic cell	BCL2L1
Activated dendritic cell	C1QB
Activated dendritic cell	SNURF
Activated dendritic cell	SPCS3
Activated dendritic cell	CCNA1
Activated dendritic cell	CEACAM8
Activated dendritic cell	NOS2
Activated dendritic cell	SRA1
Activated dendritic cell	TNFRSF6B
Activated dendritic cell	TREM1
Activated dendritic cell	TREML1
Activated dendritic cell	RHOA
Activated dendritic cell	SLC25A37
Activated dendritic cell	TNFSF14
Activated dendritic cell	TREML4
Activated dendritic cell	VNN2
Activated dendritic cell	XPO6
Activated dendritic cell	CLEC4C
Activated dendritic cell	TNFAIP2
Activated dendritic cell	UBD
Activated dendritic cell	ACTR3
Activated dendritic cell	RAB1A
Activated dendritic cell	SLA
Activated dendritic cell	HLA-DQA2
Activated dendritic cell	SIGLEC5
Activated dendritic cell	SLAMF9
CD56bright natural killer cell	ABAT
CD56bright natural killer cell	C11orf75
CD56bright natural killer cell	C5orf15
CD56bright natural killer cell	CDHR1
CD56bright natural killer cell	DCAF12
CD56bright natural killer cell	DYNLL1
CD56bright natural killer cell	GPR137B
CD56bright natural killer cell	HCP5
CD56bright natural killer cell	HDGFRP2
CD56bright natural killer cell	KRT86
CD56bright natural killer cell	MLST8
CD56bright natural killer cell	ELMOD3
CD56bright natural killer cell	ENTPD5
CD56bright natural killer cell	FAM119A
CD56bright natural killer cell	FAM179A
CD56bright natural killer cell	CLIC2
CD56bright natural killer cell	COX7A2L
CD56bright natural killer cell	CREB3L4
CD56bright natural killer cell	CSF1
CD56bright natural killer cell	CSNK2A2
CD56bright natural killer cell	CSTA
CD56bright natural killer cell	CSTB
CD56bright natural killer cell	CTPS
CD56bright natural killer cell	CTSD
CD56bright natural killer cell	FST
CD56bright natural killer cell	GATA2
CD56bright natural killer cell	GMPR
CD56bright natural killer cell	HDC
CD56bright natural killer cell	HEY1
CD56bright natural killer cell	HOXA1
CD56bright natural killer cell	HS2ST1
CD56bright natural killer cell	HS3ST1
CD56bright natural killer cell	BCL11B
CD56bright natural killer cell	CDH3
CD56bright natural killer cell	MYL6B
CD56bright natural killer cell	NAA16
CD56bright natural killer cell	ClQA
CD56bright natural killer cell	ClQB
CD56bright natural killer cell	CYP27B1
CD56bright natural killer cell	EIF3M
CD56dim natural killer cell	CYP27A1
CD56dim natural killer cell	DDX55
CD56dim natural killer cell	DYRK2
CD56dim natural killer cell	RPL37A
CD56dim natural killer cell	NOTCH3
CD56dim natural killer cell	AKR7A3
CD56dim natural killer cell	GPRC5C
CD56dim natural killer cell	GRIN1
CD56dim natural killer cell	HLA-E
CD56dim natural killer cell	PORCN
CD56dim natural killer cell	PSMC4
CD56dim natural killer cell	UPP1
CD56dim natural killer cell	IL21R
CD56dim natural killer cell	KIR2DS1
CD56dim natural killer cell	KIR2DS2
CD56dim natural killer cell	KIR2DS5
Central memory CD4 T cell	ABHD3
Central memory CD4 T cell	AHNAK
Central memory CD4 T cell	ANXA2P2
Central memory CD4 T cell	AQP3
Central memory CD4 T cell	ATHL1
Central memory CD4 T cell	BMI1
Central memory CD4 T cell	BZW2
Central memory CD4 T cell	CD63
Central memory CD4 T cell	COL4A1
Central memory CD4 T cell	CYLD
Central memory CD4 T cell	ELMO2
Central memory CD4 T cell	FYN
Central memory CD4 T cell	GLIPR1
Central memory CD4 T cell	GSS
Central memory CD4 T cell	IFITM2
Central memory CD4 T cell	ITGB1
Central memory CD4 T cell	ITGB2
Central memory CD4 T cell	KLF5
Central memory CD4 T cell	LSP1
Central memory CD4 T cell	NDUFB9
Central memory CD4 T cell	PKM2
Central memory CD4 T cell	SFXN3
Central memory CD4 T cell	SIRPG
Central memory CD4 T cell	SMAD4
Central memory CD4 T cell	STX4
Central memory CD4 T cell	TRADD
Central memory CD4 T cell	VIM
Central memory CD4 T cell	XRCC6
Central memory CD8 T cell	ACTN4
Central memory CD8 T cell	ADAM12
Central memory CD8 T cell	ADCY9
Central memory CD8 T cell	F13A1
Central memory CD8 T cell	FCER1G
Central memory CD8 T cell	FCGR3B
Central memory CD8 T cell	FGF7
Central memory CD8 T cell	FKBP4
Central memory CD8 T cell	GLUD1
Central memory CD8 T cell	GM2A
Central memory CD8 T cell	GUSB
Central memory CD8 T cell	IL1RN
Central memory CD8 T cell	NOL11
Central memory CD8 T cell	NTRK1
Central memory CD8 T cell	RARA
Central memory CD8 T cell	RNF128
Central memory CD8 T cell	SIGLEC1
Central memory CD8 T cell	TNFRSF11A
Central memory CD8 T cell	TOX4
Central memory CD8 T cell	UBA52
Central memory CD8 T cell	ULBP1
Effector memeory CD4 T cell	ATM
Effector memeory CD4 T cell	CASP3
Effector memeory CD4 T cell	CASQ1
Effector memeory CD4 T cell	CD300E
Effector memeory CD4 T cell	DARS
Effector memeory CD4 T cell	DOCK9
Effector memeory CD4 T cell	EXOSC9
Effector memeory CD4 T cell	EZH2
Effector memeory CD4 T cell	GDE1
Effector memeory CD4 T cell	IL34
Effector memeory CD4 T cell	NCOA4
Effector memeory CD4 T cell	NEFL
Effector memeory CD4 T cell	PDGFRL
Effector memeory CD4 T cell	PTGS1
Effector memeory CD4 T cell	REPS1
Effector memeory CD4 T cell	SCG2
Effector memeory CD4 T cell	SDPR
Effector memeory CD4 T cell	SIGLEC14
Effector memeory CD4 T cell	SIGLEC6
Effector memeory CD4 T cell	TAL1
Effector memeory CD4 T cell	TFEC
Effector memeory CD4 T cell	TIPIN
Effector memeory CD4 T cell	TPK1
Effector memeory CD4 T cell	UQCRB
Effector memeory CD4 T cell	USP9Y
Effector memeory CD4 T cell	WIPF1
Effector memeory CD4 T cell	ZCRB1
Effector memeory CD8 T cell	ACAP1
Effector memeory CD8 T cell	APOL3
Effector memeory CD8 T cell	ARHGAP10
Effector memeory CD8 T cell	ATP10D
Effector memeory CD8 T cell	C3AR1
Effector memeory CD8 T cell	CCR5
Effector memeory CD8 T cell	CD160
Effector memeory CD8 T cell	CD55
Effector memeory CD8 T cell	CFLAR
Effector memeory CD8 T cell	CMKLR1
Effector memeory CD8 T cell	DAPP1
Effector memeory CD8 T cell	FCRL6
Effector memeory CD8 T cell	FLT3LG
Effector memeory CD8 T cell	GZMM
Effector memeory CD8 T cell	HAPLN3
Effector memeory CD8 T cell	HLA-DMB
Effector memeory CD8 T cell	HLA-DPA1
Effector memeory CD8 T cell	HLA-DPB1
Effector memeory CD8 T cell	IFI16
Effector memeory CD8 T cell	LIME1
Effector memeory CD8 T cell	LTK
Effector memeory CD8 T cell	NFKBIA
Effector memeory CD8 T cell	SETD7
Effector memeory CD8 T cell	SIK1
Effector memeory CD8 T cell	TRIB2
Eosinophil	GIPR
Eosinophil	KRT18P50
Eosinophil	LRMP
Eosinophil	FOSB
Eosinophil	RRP12
Eosinophil	GPR183
Eosinophil	NR4A3
Eosinophil	ST3GAL6
Eosinophil	DEPDC5
Eosinophil	PDE6C
Eosinophil	PKD2L2
Eosinophil	GPR65
Eosinophil	IL5RA
Eosinophil	P2RY14
Eosinophil	DACH1
Eosinophil	DAPK2
Eosinophil	EMR3
γδ T cell	ACP5
γδ T cell	AQP9
γδ T cell	BTN3A2
γδ T cell	C1orf54
γδ T cell	CARD8
γδ T cell	CCL18
γδ T cell	CD209
γδ T cell	CD33
γδ T cell	CD36
γδ T cell	CDK5
γδ T cell	IL10RB
γδ T cell	KLRF1
γδ T cell	LGALS1
γδ T cell	MAPK7
γδ T cell	KLHL7
γδ T cell	KRT80
γδ T cell	LAMC1
γδ T cell	LCORL
γδ T cell	LMNB1
γδ T cell	MEIS3P1
γδ T cell	MPL
γδ T cell	FABP1
γδ T cell	FABP5
γδ T cell	FADD
γδ T cell	MFAP3L
γδ T cell	MINPP1
γδ T cell	RPS24
γδ T cell	RPS7
γδ T cell	RPS9
γδ T cell	DBNL
γδ T cell	CCL13
Immature B cell	CD22
Immature B cell	CYBB
Immature B cell	FAM129C
Immature B cell	FCRL1
Immature B cell	FCRL3
Immature B cell	FCRL5
Immature B cell	FCRLA
Immature B cell	HDAC9
Immature B cell	HLA-DQA1
Immature B cell	HVCN1
Immature B cell	KIAA0226
Immature B cell	NCF1
Immature B cell	NCF1B
Immature B cell	P2RY10
Immature B cell	SP100
Immature B cell	TXNIP
Immature B cell	STAP1
Immature B cell	TAGAP
Immature B cell	ZCCHC2
Immature dendritic cell	ACADM
Immature dendritic cell	AHCYL1
Immature dendritic cell	ALDH1A2
Immature dendritic cell	ALDH3A2
Immature dendritic cell	ALDH9A1
Immature dendritic cell	ALOX15
Immature dendritic cell	AMT
Immature dendritic cell	ARL1
Immature dendritic cell	ATIC
Immature dendritic cell	ATP5A1
Immature dendritic cell	CAPZA1
Immature dendritic cell	LILRA5
Immature dendritic cell	RDX
Immature dendritic cell	RRAGD
Immature dendritic cell	TACSTD2
Immature dendritic cell	INPP5F
Immature dendritic cell	RAB38
Immature dendritic cell	PLAU
Immature dendritic cell	CSF3R
Immature dendritic cell	SLC18A2
Immature dendritic cell	AMPD2
Immature dendritic cell	CLTB
Immature dendritic cell	C1orf162
Macrophage	AIF1
Macrophage	CCL1
Macrophage	CCL14
Macrophage	CCL23
Macrophage	CCL26
Macrophage	CD300LB
Macrophage	CNR1
Macrophage	CNR2
Macrophage	EIF1
Macrophage	EIF4A1
Macrophage	FPR1
Macrophage	FPR2
Macrophage	FRAT2
Macrophage	GPR27
Macrophage	GPR77
Macrophage	RNASE2
Macrophage	MS4A2
Macrophage	BASP1
Macrophage	IGSF6
Macrophage	HK3
Macrophage	VNN1
Macrophage	FES
Macrophage	NPL
Macrophage	FZD2
Macrophage	FAM198B
Macrophage	HNMT
Macrophage	SLC15A3
Macrophage	CD4
Macrophage	TXNDC3
Macrophage	FRMD4A
Macrophage	CRYBB1
Macrophage	HRH1
Macrophage	WNT5B
Mast cell	ADAMTS3
Mast cell	CPA3
Mast cell	CMA1
Mast cell	CTSG
Mast cell	ARHGAP15
Mast cell	CPM
Mast cell	FCN1
Mast cell	FTL
Mast cell	HSPA6
Mast cell	ITGA9
Mast cell	RNASE3
Mast cell	S100A4
Mast cell	SIGLEC8
Mast cell	SLC6A4
Mast cell	PTGS2
Mast cell	EGR3
Mast cell	PILRA
Myeloid-derived suppressor cell	CCR2
Myeloid-derived suppressor cell	CD14
Myeloid-derived suppressor cell	CD2
Myeloid-derived suppressor cell	CD86
Myeloid-derived suppressor cell	CXCR4
Myeloid-derived suppressor cell	FCGR2A
Myeloid-derived suppressor cell	FCGR2B
Myeloid-derived suppressor cell	FCGR3A
Myeloid-derived suppressor cell	FERMT3
Myeloid-derived suppressor cell	GPSM3
Myeloid-derived suppressor cell	IL18BP
Myeloid-derived suppressor cell	IL4R
Myeloid-derived suppressor cell	ITGAL
Myeloid-derived suppressor cell	ITGAM
Myeloid-derived suppressor cell	PARVG
Myeloid-derived suppressor cell	PSAP
Myeloid-derived suppressor cell	PTGER2
Myeloid-derived suppressor cell	PTGES2
Myeloid-derived suppressor cell	S100A8
Myeloid-derived suppressor cell	S100A9
Memory B cell	AICDA
Memory B cell	CCNA2
Memory B cell	CDKN3
Memory B cell	CLCN5
Memory B cell	ENPP1
Memory B cell	FCER1A
Memory B cell	FCRL4
Memory B cell	MYC
Memory B cell	RUNX2
Memory B cell	SORL1
Memory B cell	SOX5
Memory B cell	STAT5A
Memory B cell	STAT5B
Memory B cell	TLR9
Monocyte	ASGR2
Monocyte	CFP
Monocyte	ASGR1
Monocyte	CD1D
Monocyte	UPK3A
Monocyte	ACTG1
Monocyte	ANXA5
Monocyte	ATP6V1B2
Monocyte	CFL1
Monocyte	DAZAP2
Monocyte	CTBS
Monocyte	EMR4P
Monocyte	HIVEP2
Monocyte	MARCKSL1
Monocyte	MBP
Monocyte	MMP15
Monocyte	PNPLA6
Monocyte	TMBIM6
Monocyte	PQBP1
Monocyte	TEX264
Monocyte	IKZF1
Natural killer cell	AKT3
Natural killer cell	AXL
Natural killer cell	BST2
Natural killer cell	CDH2
Natural killer cell	CRTAM
Natural killer cell	CSF2RA
Natural killer cell	CTSZ
Natural killer cell	CXCL1
Natural killer cell	CYTH1
Natural killer cell	DAXX
Natural killer cell	DGKH
Natural killer cell	DLL4
Natural killer cell	DPYD
Natural killer cell	ERBB3
Natural killer cell	F11R
Natural killer cell	FAM27A
Natural killer cell	FAM49A
Natural killer cell	FASLG
Natural killer cell	FCGR1A
Natural killer cell	FN1
Natural killer cell	FSTL1
Natural killer cell	FUCA1
Natural killer cell	GBP3
Natural killer cell	GLS2
Natural killer cell	GRB2
Natural killer cell	LST1
Natural killer cell	BCL2
Natural killer cell	CDC5L
Natural killer cell	FGF18
Natural killer cell	FUT5
Natural killer cell	FZR1
Natural killer cell	GAGE2
Natural killer cell	IGFBP5
Natural killer cell	KANK2
Natural killer cell	LDB3
Natural killer T cell	BTN2A2
Natural killer T cell	CD101
Natural killer T cell	CD109
Natural killer T cell	CNPY3
Natural killer T cell	CNPY4
Natural killer T cell	CREB1
Natural killer T cell	CRTC2
Natural killer T cell	CRTC3
Natural killer T cell	CSF2
Natural killer T cell	KLRC1
Natural killer T cell	FUT4
Natural killer T cell	ICAM2
Natural killer T cell	IL32
Natural killer T cell	LAMP2
Natural killer T cell	LILRB5
Natural killer T cell	KLRG1
Natural killer T cell	HSPA4
Natural killer T cell	HSPB6
Natural killer T cell	ISM2
Natural killer T cell	ITIH2
Natural killer T cell	KDM4C
Natural killer T cell	KIR2DS4
Natural killer T cell	KIRREL3
Natural killer T cell	SDCBP
Natural killer T cell	NFATC2IP
Natural killer T cell	MICB
Natural killer T cell	KIR2DL1
Natural killer T cell	KIR2DL3
Natural killer T cell	KIR3DL1
Natural killer T cell	KIR3DL2
Natural killer T cell	NCR1
Natural killer T cell	FOSL1
Natural killer T cell	TSLP
Natural killer T cell	SLC7A7
Natural killer T cell	SPP1
Natural killer T cell	TREM2
Natural killer T cell	UBASH3A
Natural killer T cell	YBX2
Natural killer T cell	CCDC88A
Natural killer T cell	CLEC1A
Natural killer T cell	THBD
Natural killer T cell	PDPN
Natural killer T cell	VCAM1
Natural killer T cell	EMR1
Neutrophil	CREB5
Neutrophil	CDA
Neutrophil	CHST15
Neutrophil	S100A12
Neutrophil	APOBEC3A
Neutrophil	CASP5
Neutrophil	MMP25
Neutrophil	HAL
Neutrophil	C1orf183
Neutrophil	FFAR2
Neutrophil	MAK
Neutrophil	CXCR1
Neutrophil	STEAP4
Neutrophil	MGAM
Neutrophil	BTNL8
Neutrophil	CXCR2
Neutrophil	TNFRSF10C
Neutrophil	VNN3
Plasmacytoid dendritic cell	CBX6
Plasmacytoid dendritic cell	DAB2
Plasmacytoid dendritic cell	DDX17
Plasmacytoid dendritic cell	HIGD1A
Plasmacytoid dendritic cell	IDH3A
Plasmacytoid dendritic cell	IL3RA
Plasmacytoid dendritic cell	MAGED1
Plasmacytoid dendritic cell	NUCB2
Plasmacytoid dendritic cell	OFD1
Plasmacytoid dendritic cell	OGT
Plasmacytoid dendritic cell	PDIA4
Plasmacytoid dendritic cell	SERTAD2
Plasmacytoid dendritic cell	SIRPA
Plasmacytoid dendritic cell	TMED2
Plasmacytoid dendritic cell	ENG
Plasmacytoid dendritic cell	FCAR
Plasmacytoid dendritic cell	IGF1
Plasmacytoid dendritic cell	ITGA2B
Plasmacytoid dendritic cell	GABARAP
Plasmacytoid dendritic cell	GPX1
Plasmacytoid dendritic cell	KRT23
Plasmacytoid dendritic cell	PROK2
Plasmacytoid dendritic cell	RALB
Plasmacytoid dendritic cell	RETNLB
Plasmacytoid dendritic cell	RNF141
Plasmacytoid dendritic cell	SEC14L1
Plasmacytoid dendritic cell	SEPX1
Plasmacytoid dendritic cell	EMP3
Plasmacytoid dendritic cell	CD300LF
Plasmacytoid dendritic cell	ABTB1
Plasmacytoid dendritic cell	KLHL21
Plasmacytoid dendritic cell	PHRF1
Regulatory T cell	CCL3L1
Regulatory T cell	CD72
Regulatory T cell	CLEC5A
Regulatory T cell	FOXP3
Regulatory T cell	ITGA4
Regulatory T cell	L1CAM
Regulatory T cell	LIPA
Regulatory T cell	LRP1
Regulatory T cell	LRRC42
Regulatory T cell	MARCO
Regulatory T cell	MMP12
Regulatory T cell	MNDA
Regulatory T cell	MRC1
Regulatory T cell	MS4A6A
Regulatory T cell	PELO
Regulatory T cell	PLEK
Regulatory T cell	PRSS23
Regulatory T cell	PTGIR
Regulatory T cell	ST8SIA4
Regulatory T cell	STAB1
T follicular helper cell	B3GAT1
T follicular helper cell	CDK5R1
T follicular helper cell	PDCD1
T follicular helper cell	BCL6
T follicular helper cell	CD200
T follicular helper cell	CD83
T follicular helper cell	CD84
T follicular helper cell	FGF2
T follicular helper cell	GPR18
T follicular helper cell	CEBPA
T follicular helper cell	CECR1
T follicular helper cell	CLEC10A
T follicular helper cell	CLEC4A
T follicular helper cell	CSF1R
T follicular helper cell	CTSS
T follicular helper cell	DMN
T follicular helper cell	DPP4
T follicular helper cell	LRRC32
T follicular helper cell	MC5R
T follicular helper cell	MICA
T follicular helper cell	NCAM1
T follicular helper cell	NCR2
T follicular helper cell	NRP1
T follicular helper cell	PDCD1LG2
T follicular helper cell	PDCD6
T follicular helper cell	PRDX1
T follicular helper cell	RAE1
T follicular helper cell	RAET1E
T follicular helper cell	SIGLEC7
T follicular helper cell	SIGLEC9
T follicular helper cell	TYRO3
T follicular helper cell	CHST12
T follicular helper cell	CLIC3
T follicular helper cell	IVNS1ABP
T follicular helper cell	KIR2DL2
T follicular helper cell	LGMN
Type 1 T helper cell	CD70
Type 1 T helper cell	TBX21
Type 1 T helper cell	ADAM8
Type 1 T helper cell	AHCYL2
Type 1 T helper cell	ALCAM
Type 1 T helper cell	B3GALNT1
Type 1 T helper cell	BBS12
Type 1 T helper cell	BST1
Type 1 T helper cell	CD151
Type 1 T helper cell	CD47
Type 1 T helper cell	CD48
Type 1 T helper cell	CD52
Type 1 T helper cell	CD53
Type 1 T helper cell	CD59
Type 1 T helper cell	CD6
Type 1 T helper cell	CD68
Type 1 T helper cell	CD7
Type 1 T helper cell	CD96
Type 1 T helper cell	CFHR3
Type 1 T helper cell	CHRM3
Type 1 T helper cell	CLEC7A
Type 1 T helper cell	COL23A1
Type 1 T helper cell	COL4A4
Type 1 T helper cell	COL5A3
Type 1 T helper cell	DAB1
Type 1 T helper cell	DLEU7
Type 1 T helper cell	DOC2B
Type 1 T helper cell	EMP1
Type 1 T helper cell	F12
Type 1 T helper cell	FURIN
Type 1 T helper cell	GAB3
Type 1 T helper cell	GATM
Type 1 T helper cell	GFPT2
Type 1 T helper cell	GPR25
Type 1 T helper cell	GREM2
Type 1 T helper cell	HAVCR1
Type 1 T helper cell	HSD11B1
Type 1 T helper cell	HUNK
Type 1 T helper cell	IGF2
Type 1 T helper cell	RCSD1
Type 1 T helper cell	RYR1
Type 1 T helper cell	SAV1
Type 1 T helper cell	SELE
Type 1 T helper cell	SELP
Type 1 T helper cell	SH3KBP1
Type 1 T helper cell	SIT1
Type 1 T helper cell	SLC35B3
Type 1 T helper cell	SIGLEC10
Type 1 T helper cell	SKAP1
Type 1 T helper cell	THUMPD2
Type 1 T helper cell	TIGIT
Type 1 T helper cell	ZEB2
Type 1 T helper cell	ENC1
Type 1 T helper cell	FAM134B
Type 1 T helper cell	FBXO30
Type 1 T helper cell	FCGR2C
Type 1 T helper cell	STAC
Type 1 T helper cell	LTC4S
Type 1 T helper cell	MAN1B1
Type 1 T helper cell	MDH1
Type 1 T helper cell	MMD
Type 1 T helper cell	RGS16
Type 1 T helper cell	IL12A
Type 1 T helper cell	P2RX5
Type 1 T helper cell	CD97
Type 1 T helper cell	ITGB4
Type 1 T helper cell	ICAM3
Type 1 T helper cell	METRNL
Type 1 T helper cell	TNFRSF1A
Type 1 T helper cell	IRF1
Type 1 T helper cell	HTR2B
Type 1 T helper cell	CALD1
Type 1 T helper cell	MOCOS
Type 1 T helper cell	TRAF3IP2
Type 1 T helper cell	TLR8
Type 1 T helper cell	TRAF1
Type 1 T helper cell	DUSP14
Type 17 T helper cell	IL17A
Type 17 T helper cell	IL17RA
Type 17 T helper cell	C2CD4A
Type 17 T helper cell	C2CD4B
Type 17 T helper cell	CA2
Type 17 T helper cell	CCDC65
Type 17 T helper cell	CEACAM3
Type 17 T helper cell	IL17C
Type 17 T helper cell	IL17F
Type 17 T helper cell	IL17RC
Type 17 T helper cell	IL17RE
Type 17 T helper cell	IL23A
Type 17 T helper cell	ILDR1
Type 17 T helper cell	LONRF3
Type 17 T helper cell	SH2D6
Type 17 T helper cell	TNIP2
Type 17 T helper cell	ABCA1
Type 17 T helper cell	ABCB1
Type 17 T helper cell	ADAMTS12
Type 17 T helper cell	ANK1
Type 17 T helper cell	ANKRD22
Type 17 T helper cell	B3GALT2
Type 17 T helper cell	CAMTA1
Type 17 T helper cell	CCR9
Type 17 T helper cell	CD40
Type 17 T helper cell	GPR44
Type 17 T helper cell	IFT80
Type 2 T helper cell	ASB2
Type 2 T helper cell	CSRP2
Type 2 T helper cell	DAPK1
Type 2 T helper cell	DLC1
Type 2 T helper cell	DNAJC12
Type 2 T helper cell	DUSP6
Type 2 T helper cell	GNAI1
Type 2 T helper cell	LAMP3
Type 2 T helper cell	NRP2
Type 2 T helper cell	OSBPL1A
Type 2 T helper cell	PDE4B
Type 2 T helper cell	PHLDA1
Type 2 T helper cell	PLA2G4A
Type 2 T helper cell	RAB27B
Type 2 T helper cell	RBMS3
Type 2 T helper cell	RNF125
Type 2 T helper cell	TMPRSS3
Type 2 T helper cell	GATA3
Type 2 T helper cell	BIRC5
Type 2 T helper cell	CDC25C
Type 2 T helper cell	CDC7
Type 2 T helper cell	CENPF
Type 2 T helper cell	CXCR6
Type 2 T helper cell	DHFR
Type 2 T helper cell	EVI5
Type 2 T helper cell	GSTA4
Type 2 T helper cell	HELLS
Type 2 T helper cell	IL26
Type 2 T helper cell	LAIR2
